# Supplementary material for: One-step chemical vapor deposition of MoS2 nanosheets on SiNWs as photocathodes for efficient and stable solar-driven hydrogen production
Source: Royal Society of Chemistry journal article supplement (doi:10.1039/c7nr09235k), 2018-01-01
Supplement: c7nr09235k1.pdf [file c7nr09235k1.pdf]

## Electronic Supporting Information

### **One-step Chemical Vapor Deposition of MoS<sub>2</sub> Nanosheets on SiNWs as Photocathodes for Efficient and Stable Solar-driven Hydrogen Production**

Die Hu<sup>a</sup>, Jie Xiang<sup>a</sup>, Qingwei Zhou<sup>c</sup>, Shaoqiang Su<sup>a</sup>, Zongbao Zhang<sup>a</sup>, Xin Wang<sup>b</sup>, Mingliang Jin<sup>b</sup>, Li Nian<sup>b</sup>, Richard Nözel<sup>b</sup>, Guofu Zhou<sup>b</sup>, Zhang Zhang<sup>\*a</sup> and Junming Liu<sup>ac</sup>

<sup>a</sup>Institute for Advanced Materials, South China Academy of Advanced Optoelectronics, and Guangdong Provincial Key Laboratory of Quantum Engineering and Quantum Materials, South China Normal University, Guangzhou 510006, China.

<sup>b</sup>Institute of Electronic Paper Displays and Guangdong Provincial Key Laboratory of Optical Information Materials and Technology, South China Academy of Advanced Optoelectronics, South China Normal University, Guangzhou 510006, China.

<sup>c</sup>Laboratory of Solid State Microstructures, Innovation Center of Advanced Microstructures, Nanjing University, Nanjing 210093, China.

*\*Corresponding Authors: z Zhang@scnu.edu.cn*

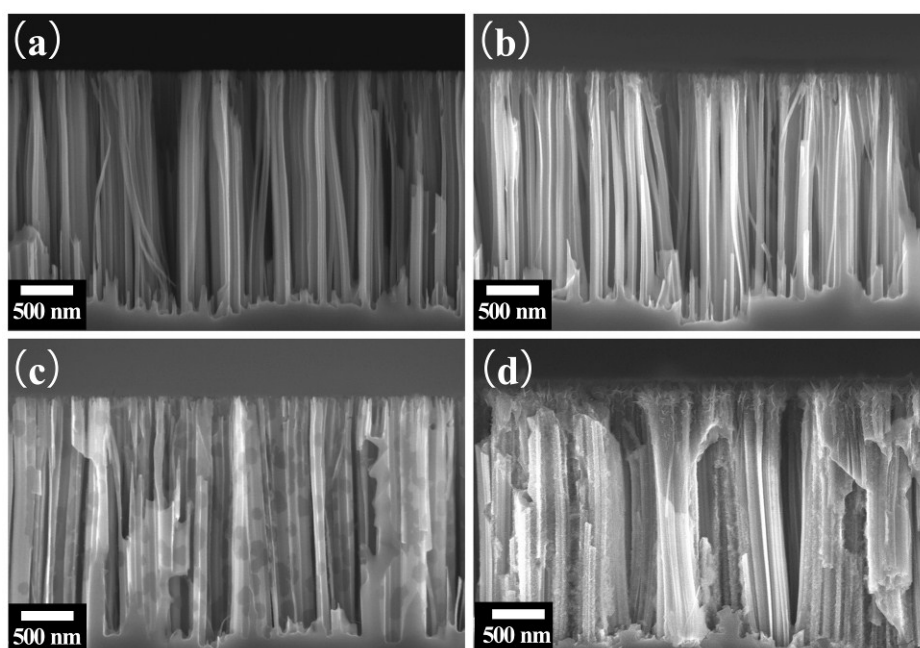

**Fig. S1** Cross-sectional SEM images of SiNWs/MoS<sub>2</sub> with different deposited times during the CVD process. (a-d) represent 0 min, 10 min, 20 min and 30 min, respectively.

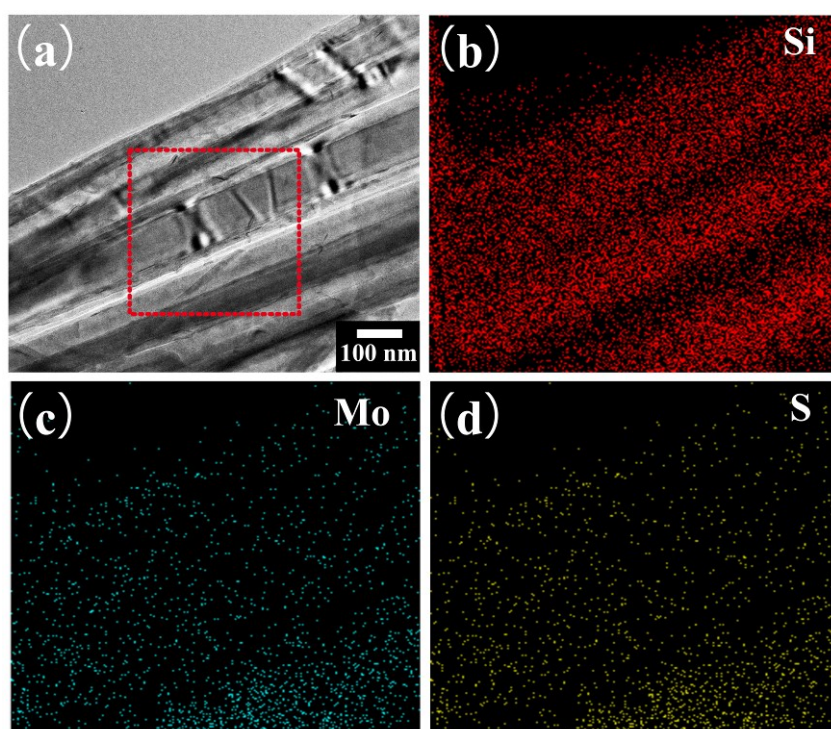

**Fig. S2** (a) TEM image of SiNWs/MoS<sub>2</sub>. (b) - (d) corresponding Si, Mo and S elemental mapping images in the selected area, respectively, indicating the evenly distribution of Mo and S on the surface of SiNWs.

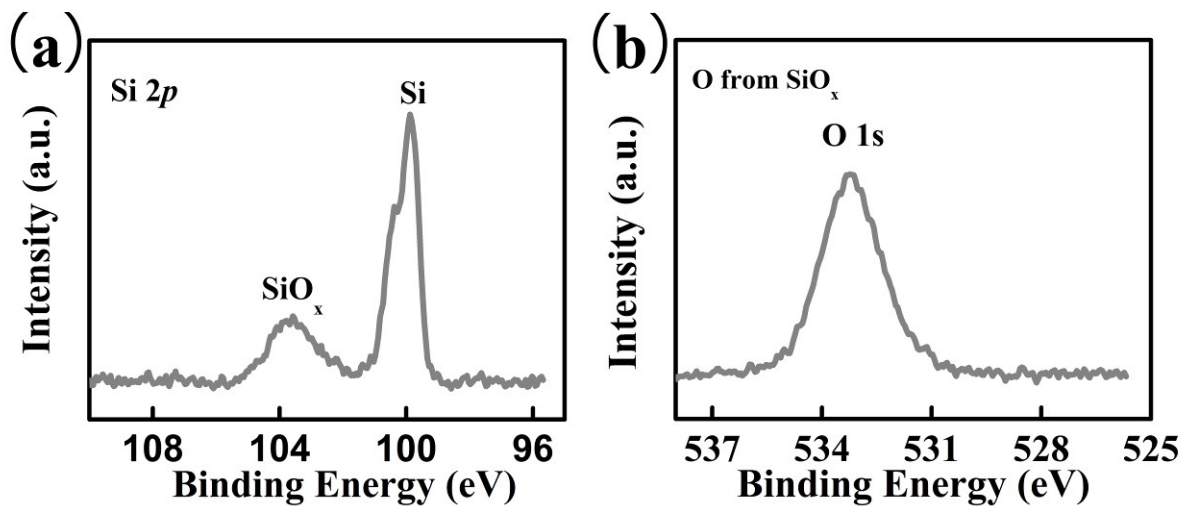

Fig. S3 XPS spectrum of SiNWs/MoS<sub>2</sub>. (a) Si 2p and (b) O 1s.

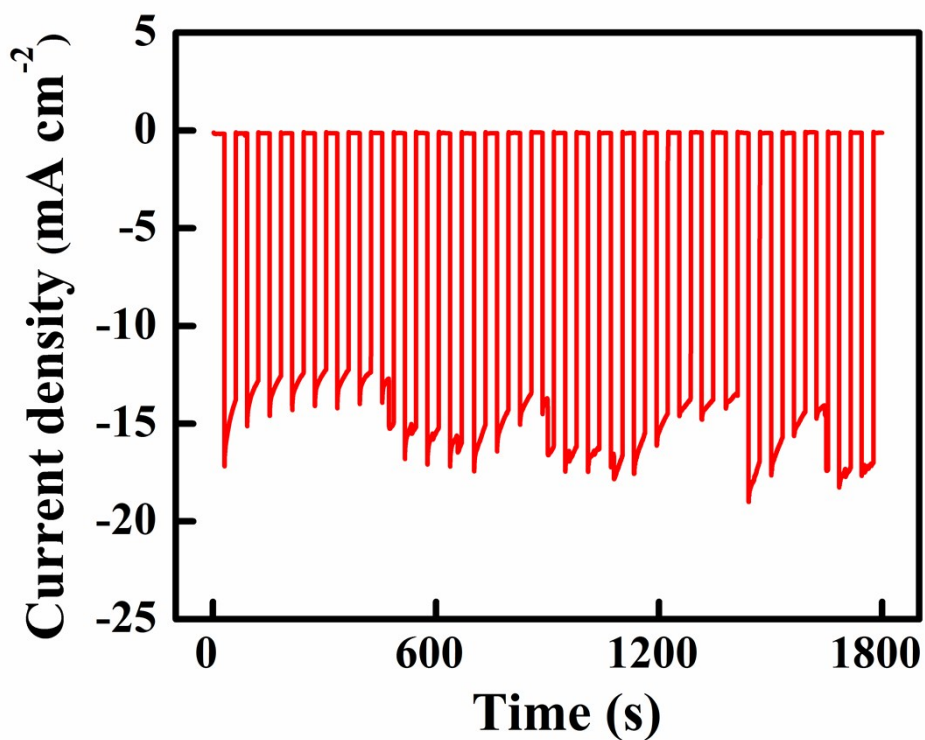

Fig. S4 Plot of the transient current time responses to on-off cycles of illumination on SiNWs/MoS<sub>2</sub> photocathode at zero overpotential.

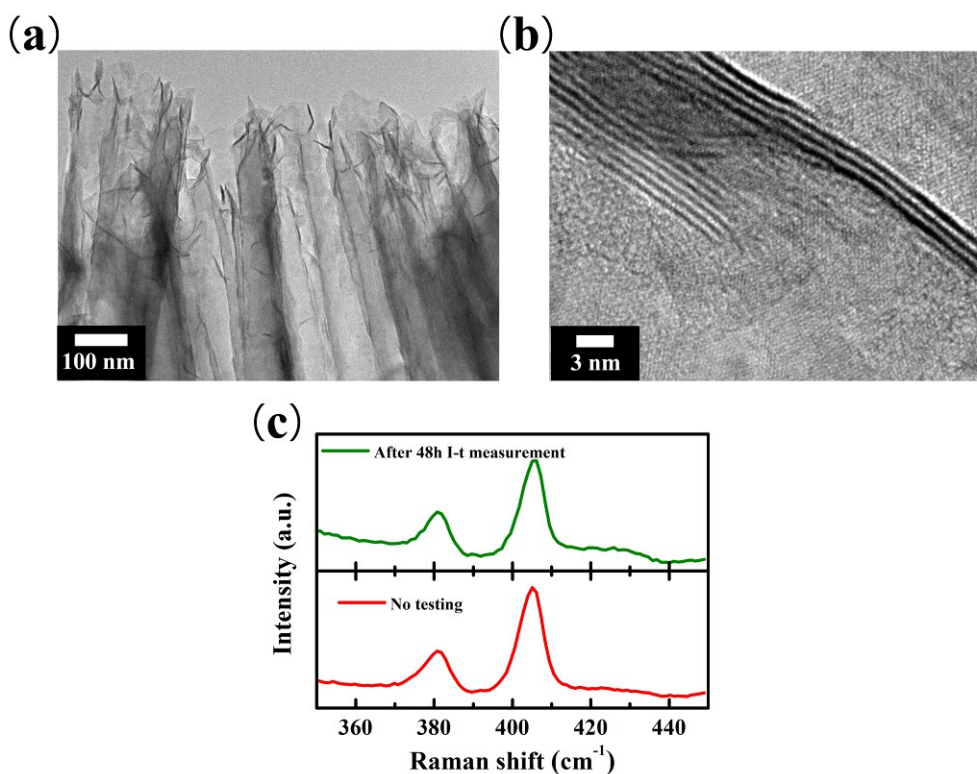

**Fig. S5** TEM image (a) and HRTEM image (b) of SiNWs/MoS<sub>2</sub> photocathode after 48 h I-t measurement, exhibiting negligible change in morphology and structure compared with the fresh sample. (c) Raman spectra measured before and after 48 h I-t measurement.

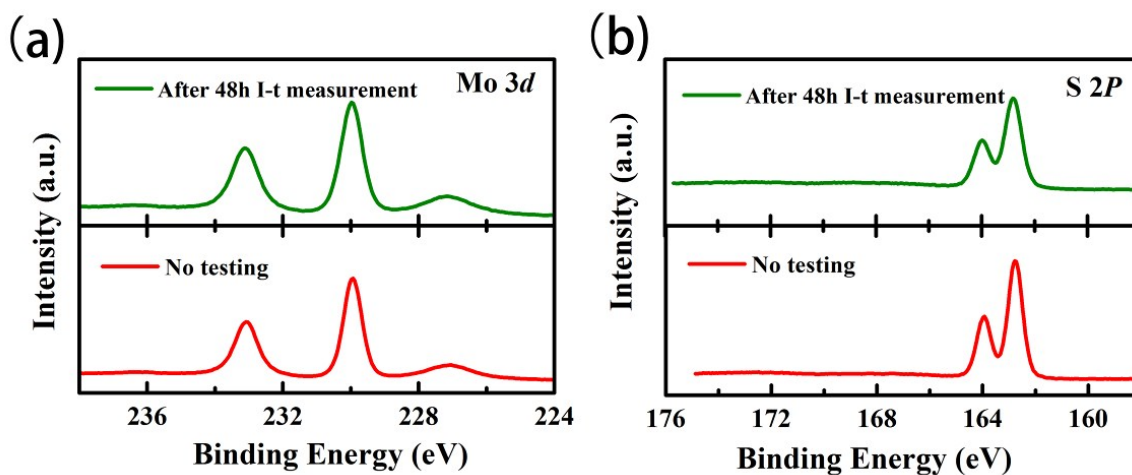

**Fig. S6** (a) and (b) XPS spectra of Mo and S from SiNWs/MoS<sub>2</sub> sample before and after 48 h I-t measurement, showing no obvious change of the oxidation states, indicating superior stability of the MoS<sub>2</sub> nanosheets on the surface of SiNWs.

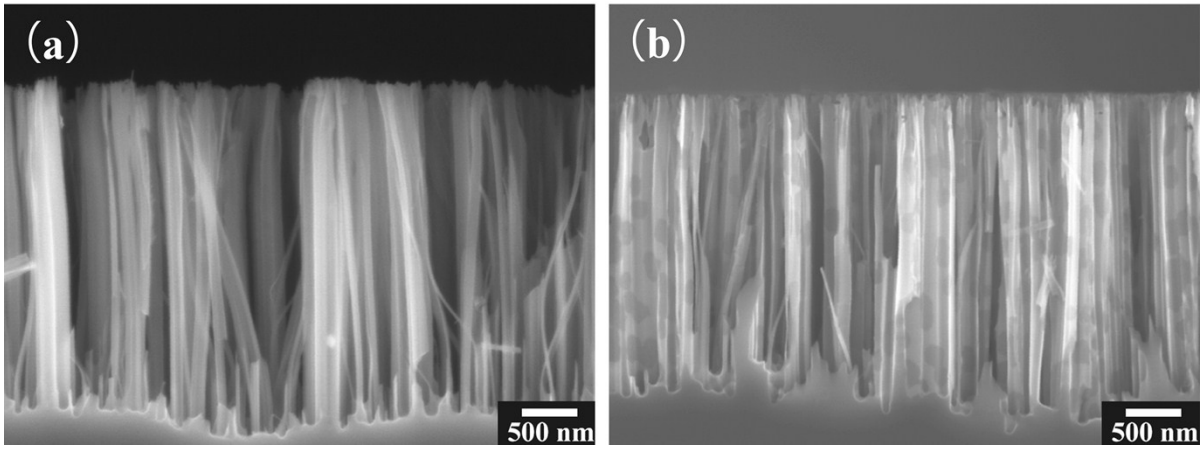

**Fig. S7** The cross-section SEM images of (a) the bare SiNWs photocathode and (b) the fabricated SiNWs/MoS<sub>2</sub> photocathode.
